# Supplementary material for: Construction of porous 2D MOF nanosheets for rapid and selective adsorption of cationic dyes
Source: Royal Society of Chemistry journal article supplement (doi:10.1039/d0dt04143b), 2021-01-01
Supplement: d0dt04143b1.pdf [file d0dt04143b1.pdf]

# Construction of porous 2D MOF nanosheets for rapid and selective adsorption of cationic dyes

Huijie Li, Kuan Gao, Bingyan Mo, Qing Meng, Ke Li, Jie Wu,\* and Hongwei Hou\*

College of Chemistry, Zhengzhou University, Zhengzhou 450001, P. R. China.

## Contents

**Fig. S1**  $^1\text{H}$  NMR spectrum of Zr-BTB.

**Fig. S2**  $^1\text{H}$  NMR spectrum of Zr-BTB- $\text{H}_4\text{TBAPy}$ .

**Fig. S3**  $^1\text{H}$  NMR spectrum of PCN-134-2D.

**Fig. S4** FTIR spectra of Zr-BTB, PCN-134-2D and Zr-BTB- $\text{H}_4\text{TBAPy}$  nanosheets.

**Fig. S5** (a) SEM image and (b-d) EDX mapping of Zr-BTB nanosheets.

**Fig. S6** (a) SEM image and (b-e) EDX mapping of PCN-134-2D nanosheets.

**Fig. S7** TEM images of Zr-BTB- $\text{H}_4\text{TBAPy}$  at different sizes.

**Fig. S8** (a) AFM image and (b) corresponding height profiles of Zr-BTB.

**Fig. S9** The TGA diagrams of Zr-BTB, PCN-134-2D and Zr-BTB- $\text{H}_4\text{TBAPy}$ .

**Fig. S10** Chemical structures of various dyes employed.

**Fig. S11** UV-vis spectra of (a) RhB (b) MLB (c) MB and (d) MO.

**Fig. S12** Dye adsorption abilities to MB, MO, RhB and MLB as a function of time by (a) Zr-BTB- $\text{H}_4\text{TBAPy}$  and (b) PCN-134-2D.

**Fig. S13** (a) Adsorption abilities of different doses of Zr-BTB- $\text{H}_4\text{TBAPy}$  to MB. (b) Adsorption abilities of Zr-BTB- $\text{H}_4\text{TBAPy}$  to MB at varied temperature.

**Fig. S14** Effects of contact time on the (a) RhB and (b) MLB adsorption of Zr-BTB- $\text{H}_4\text{TBAPy}$  and PCN-134-2D.

**Fig. S15** The UV-Vis spectra and adsorption images of MO and MLB mixed dye solutions before and after adsorption onto the Zr-BTB- $\text{H}_4\text{TBAPy}$ .

**Fig. S16** Recycle of the removal efficiency of Zr-BTB- $\text{H}_4\text{TBAPy}$  for RhB.

**Fig. S17** (a) The SEM image of the Zr-BTB- $\text{H}_4\text{TBAPy}$  after 4 cycles. (b) The XRD patterns of before and after 4 cycles for Zr-BTB- $\text{H}_4\text{TBAPy}$ .

**Fig. S18** Zeta potential of Zr-BTB at pH=7.

**Fig. S19** (a) Adsorption uptakes of MLB in the Zr-BTB-H<sub>4</sub>TBAPy and PCN-134-2D nanosheets (b) Temkin, (c) Freundlich and (d) Langmuir isotherm models.

**Table S1** Characteristic parameters of the adsorption of MLB on the Zr-BTB-H<sub>4</sub>TBAPy and PCN-134-2D.

**Table S2** Characteristic parameters of the adsorption of RhB on the Zr-BTB-H<sub>4</sub>TBAPy and PCN-134-2D.

### **Synthesis of Zr-BTB**

The 2D zirconium-based metal-organic frameworks (MOFs) Zr-BTB were prepared according to previous report. A mixture of  $ZrCl_4$  (100 mg),  $H_3BTB$  (100 mg), benzoic acid (6g), water (5 mL) and DMF (30 mL) was introduced into a Pyrex vial. The mixture was heated in 120 °C oven for 48 h. After cooling down to room temperature, the obtained solid was collected by centrifugation, and washed several times with DMF and acetone. Then the product was dried at 60 °C under vacuum for 12 h, resulting in white Zr-BTB nanosheets.

### **Activation of Zr-BTB**

Approximately as-synthesized Zr-2D-MOF sample (40 mg) was soaked in a mixture of DMF (12 mL) and 8 M aqueous HCl (0.5 mL) at 100 °C for 24 h to remove unreacted starting ligands, inorganic species and trapped benzoic acid. After cooling down to room temperature, the solution was removed and the residual was washed twice with DMF. Subsequently the solid residue was washed twice with acetone and soaked in acetone for additional 12 h. Zr-2D-MOF nanosheets were collected by centrifugation and activated at 60 °C under vacuum for 12 h.

### **Synthesis of PCN-134-2D**

$H_2TCPP$  (87 mg) in DMF (10 mL) was ultrasonically dissolved for 10 min in a 20 mL Pyrex vial. Then Zr-BTB nanosheet (50 mg) was added and incubated in the solution at 100 °C for 12 h. After cooling down to room temperature, the obtained solid powder was collected by centrifugation and washed several times with DMF and acetone. The product was dried at 60 °C under vacuum for 12 h, yielding light brown crystals. To determine TCPP/BTB ratio of PCN-134-2D, around 5 mg of samples were dissolved in 1 mL of a 10%  $D_2SO_4/DMSO-d_6$ . The TCPP/BTB ratio was determined to be 0.25 by  $^1H$ -NMR measurements.

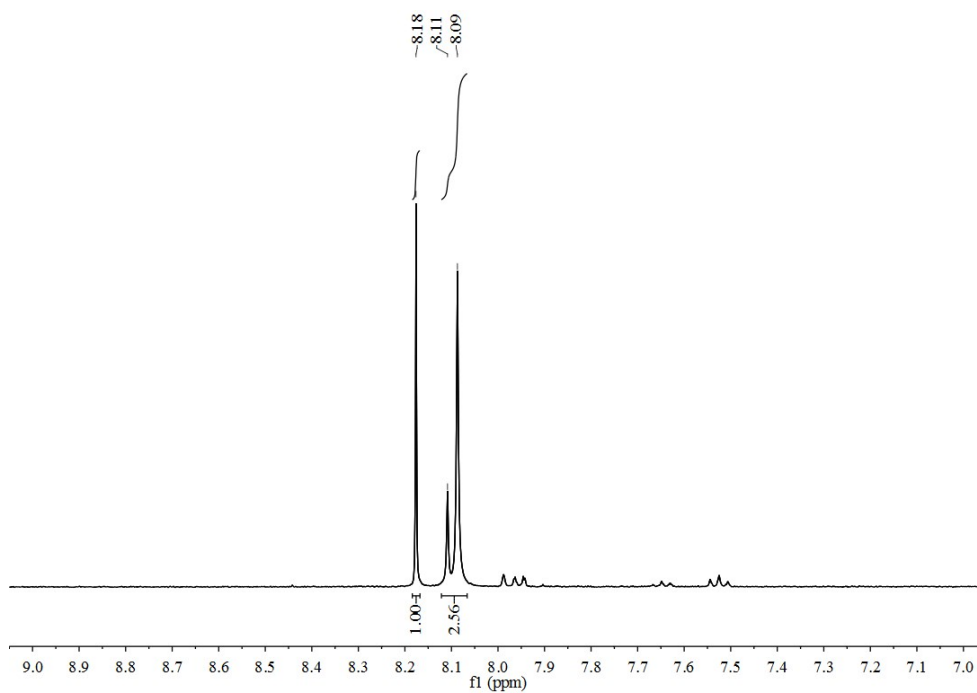

Fig. S1  $^1\text{H}$  NMR (400 MHz, DMSO- $d_6$ ) spectrum of Zr-BTB.

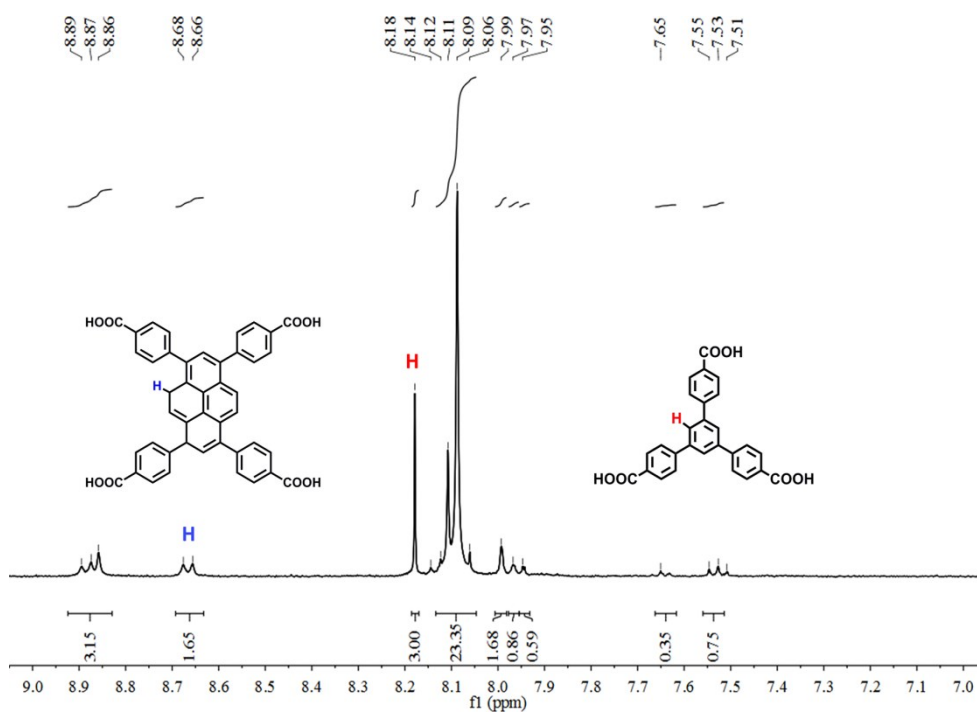

Fig. S2  $^1\text{H}$  NMR (400 MHz, DMSO- $d_6$ ) spectrum of Zr-BTB- $\text{H}_4\text{TBAPy}$ .

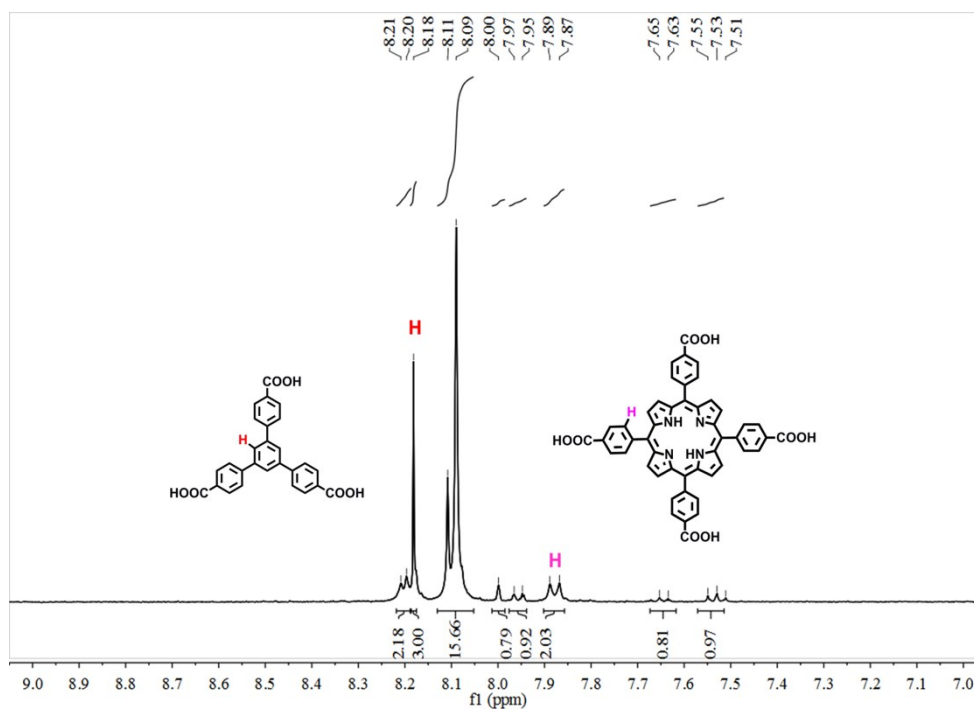

**Fig. S3**  $^1\text{H}$  NMR (400 MHz, DMSO- $d_6$ ) spectrum of PCN-134-2D.

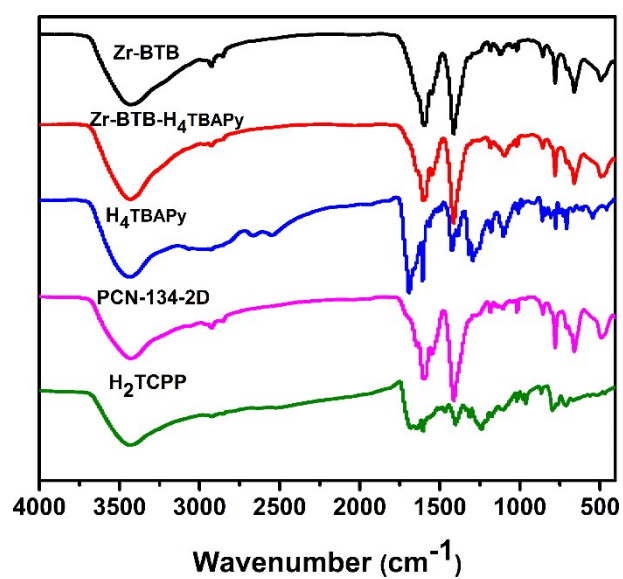

**Fig. S4** FTIR spectra of Zr-BTB, PCN-134-2D and Zr-BTB- $\text{H}_4\text{TBAPy}$  nanosheets.

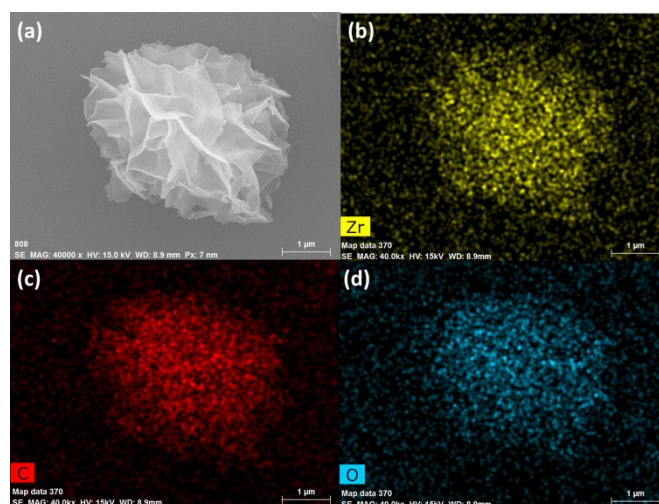

Fig. S5 (a) SEM image and (b-d) EDX mapping of Zr-BTB nanosheets.

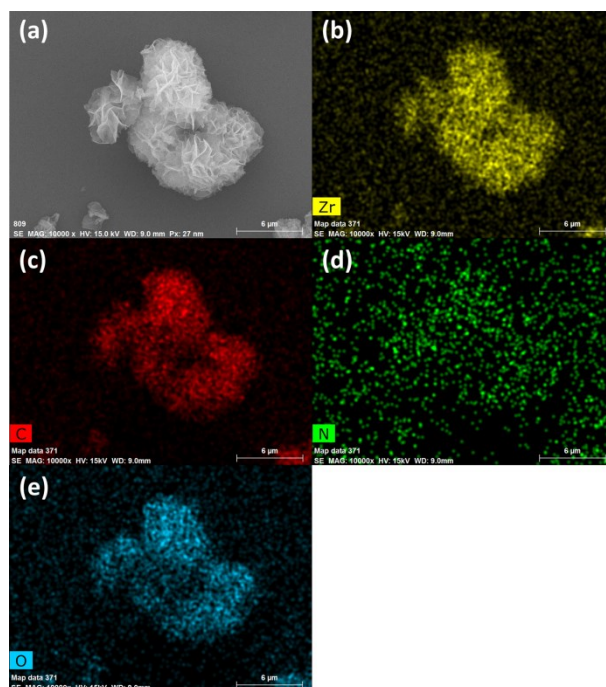

Fig. S6 (a) SEM image and (b-e) EDX mapping of PCN-134-2D nanosheets.

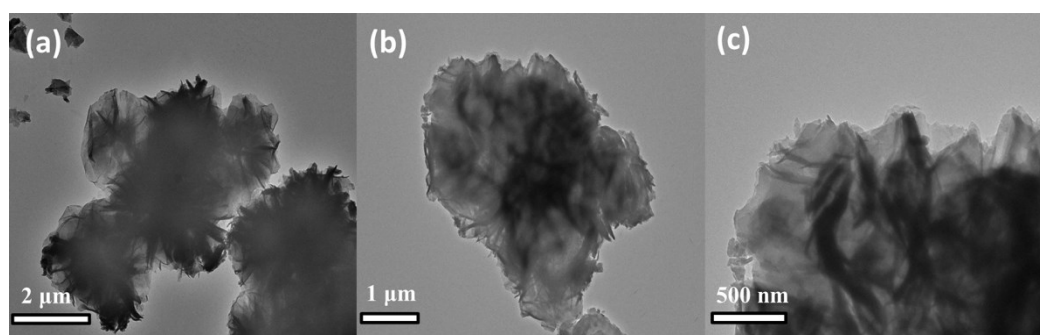

Fig. S7 TEM images of Zr-BTB-H<sub>4</sub>TBAPy at different sizes.

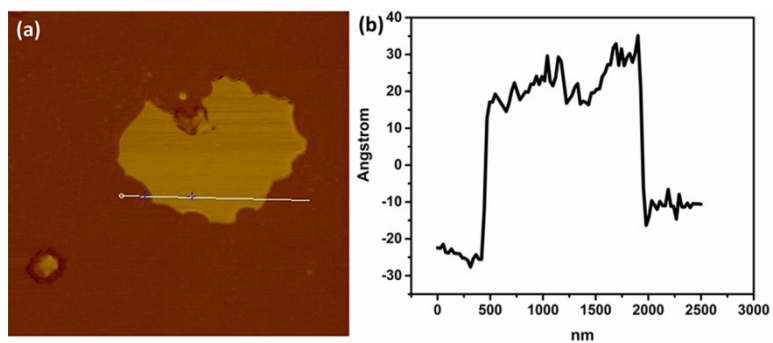

**Fig. S8** (a) AFM image and (b) corresponding height profiles of Zr-BTB.

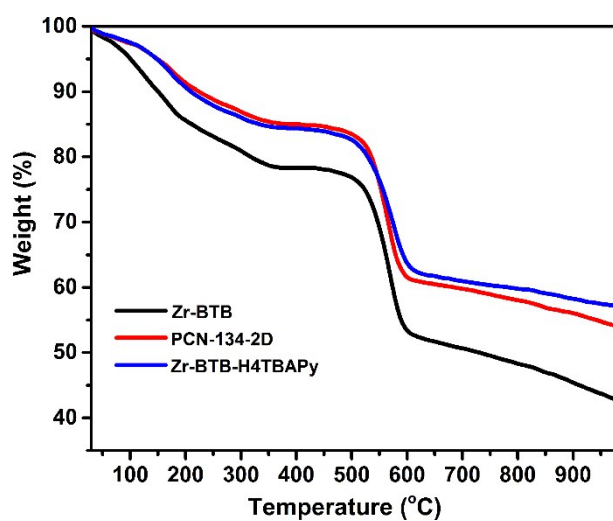

**Fig. S9** The TGA diagrams of Zr-BTB, PCN-134-2D and Zr-BTB-H<sub>4</sub>TBAPy under air condition.

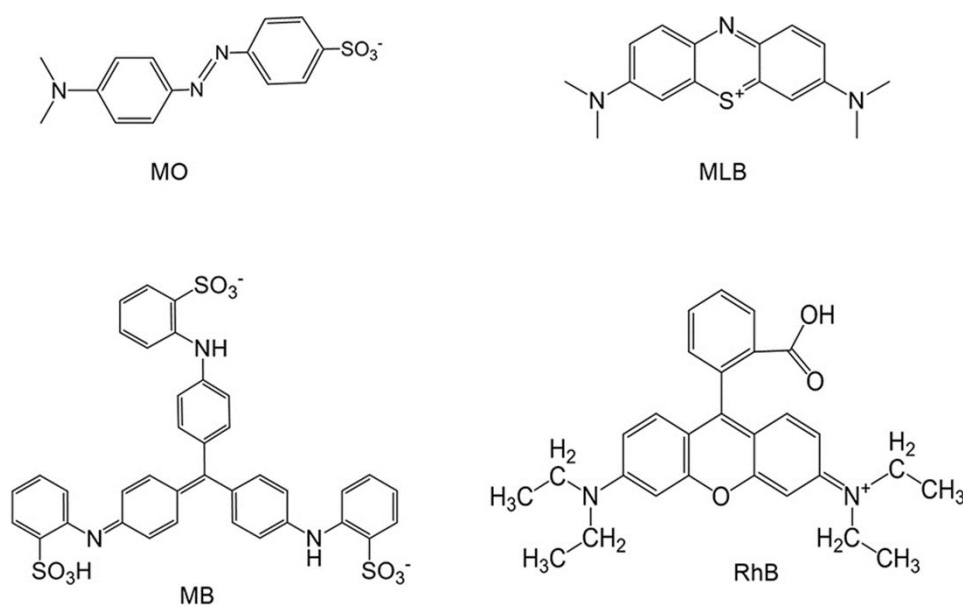

**Fig. S10** Chemical structures of various dyes employed.

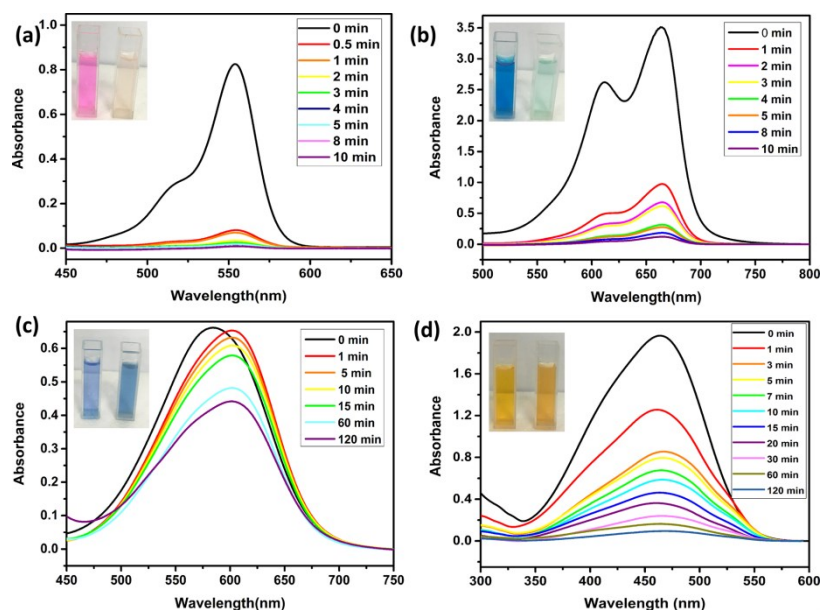

**Fig. S11** UV-vis spectra of (a) RhB (b) MLB (c) MB (d) MO in aqueous solutions at different times during the adsorption experiments with PCN-134-2D as the adsorbent and the corresponding photographic images of adsorption during 10 min.

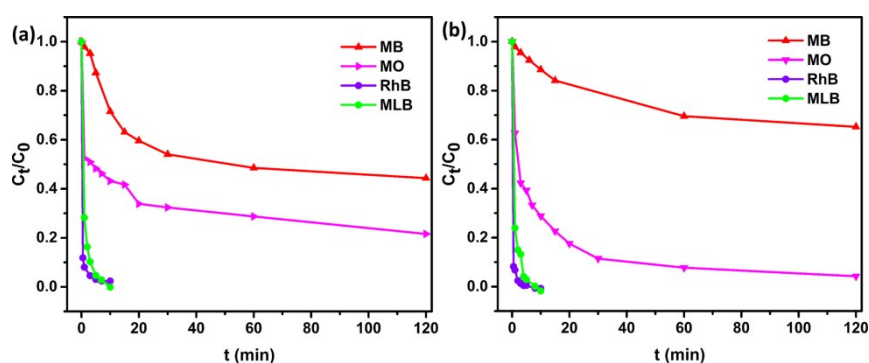

**Fig.S12** Dye adsorption abilities to MB, MO, RhB and MLB as a function of time by (a) Zr-BTB-H<sub>4</sub>TBAPy and (b) PCN-134-2D.

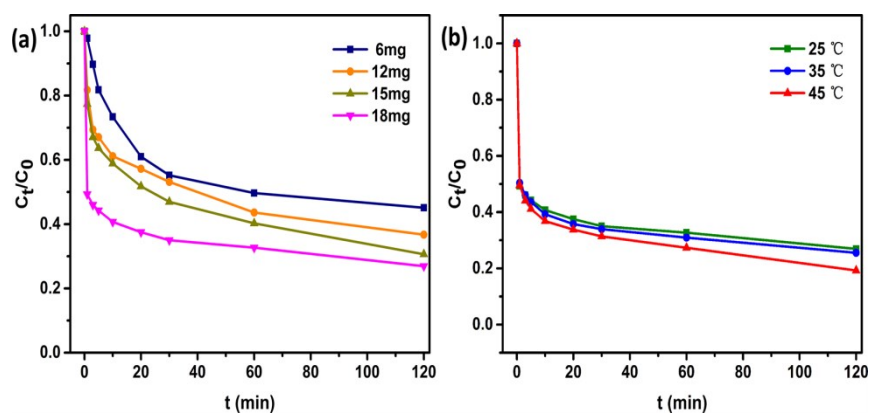

**Fig. S13** (a) Adsorption abilities of different doses of Zr-BTB-H<sub>4</sub>TBAPy to MB. (b) Adsorption abilities of Zr-BTB-H<sub>4</sub>TBAPy to MB at varied temperature.



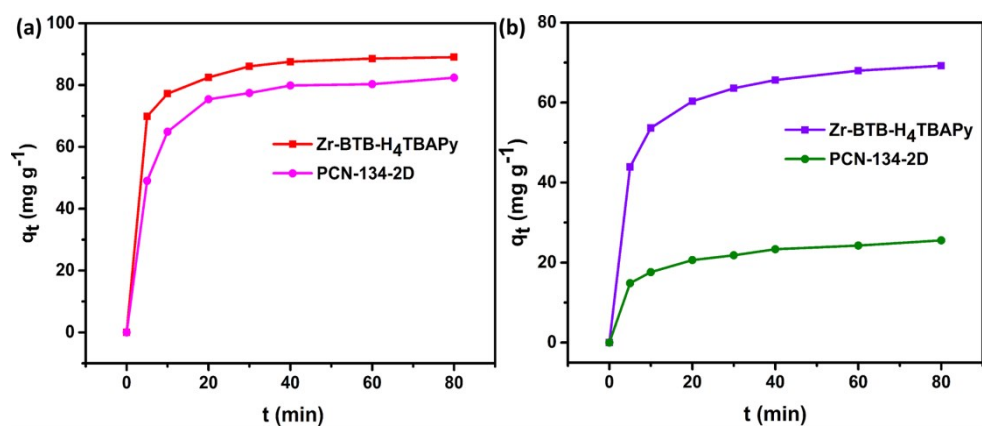

**Fig. S14** Effects of contact time on the (a) RhB and (b) MLB adsorption of Zr-BTB- $\text{H}_4$ TBAPy and PCN-134-2D.

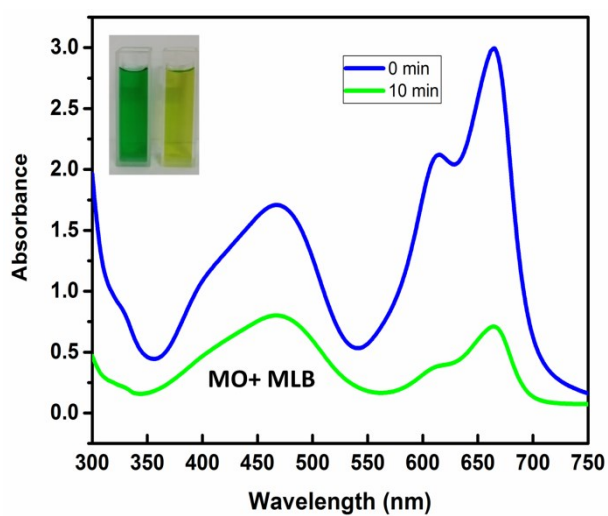

**Fig. S15** The UV-Vis spectra and adsorption images of MO and MLB mixed dye solutions before and after adsorption onto the Zr-BTB- $\text{H}_4$ TBAPy.

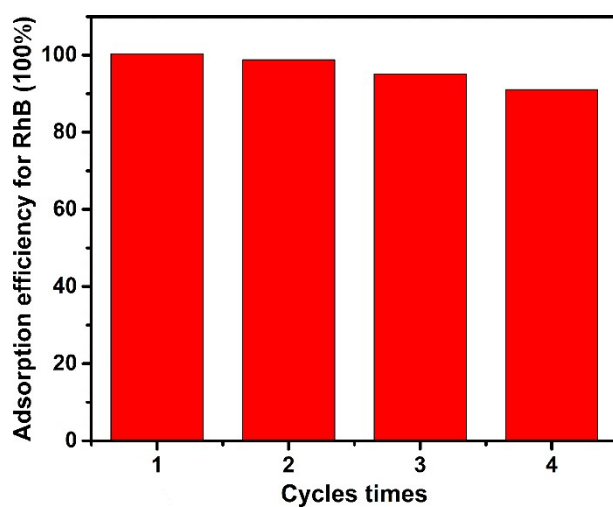

**Fig. S16** Recycle of the removal efficiency of Zr-BTB- $\text{H}_4$ TBAPy nanosheet for RhB.

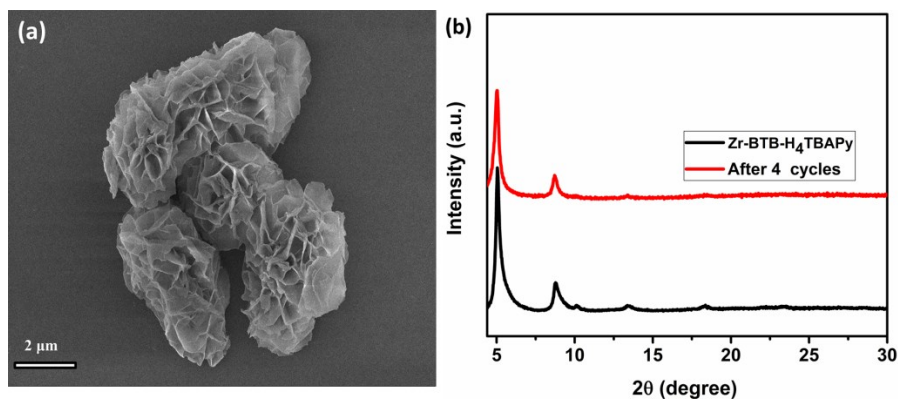

**Fig. S17** (a) The SEM image of the Zr-BTB-H<sub>4</sub>TBAPy after 4 cycles. (b) The XRD patterns of before and after 4 cycles for Zr-BTB-H<sub>4</sub>TBAPy.

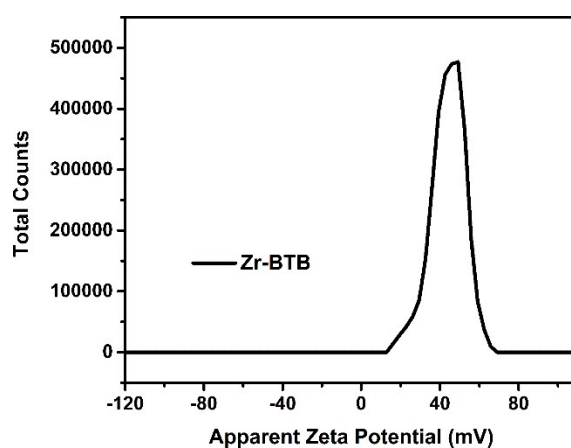

**Fig. S18** Zeta potential of Zr-BTB at pH=7.

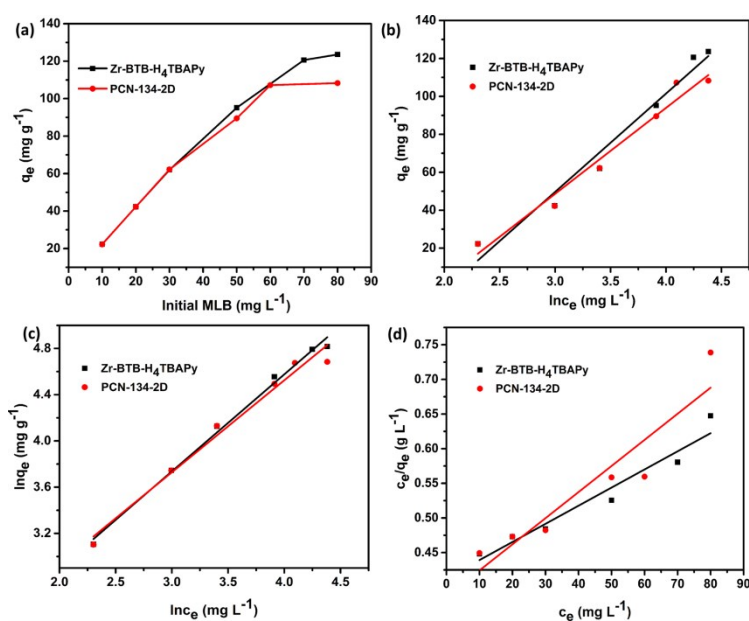

**Fig. S19** (a) Adsorption uptakes of MLB in the Zr-BTB-H<sub>4</sub>TBAPy and PCN-134-2D nanosheets after 24 h as a function of the initial MLB and plots of the fitting of the experimental data with (b) Temkin, (c) Freundlich and (d) Langmuir isotherm models.

**Table S1** Characteristic parameters of the adsorption of MLB on the Zr-BTB-H<sub>4</sub>TBAPy and PCN-134-2D.

|                     |                     | Shape                                                           | Zr-BTB-H <sub>4</sub> TBAPy | PCN-134-2D            |
|---------------------|---------------------|-----------------------------------------------------------------|-----------------------------|-----------------------|
| Adsorption kinetics | Pseudo-first-order  | $q_{e,Exp}$ (mg g <sup>-1</sup> )                               | 69.2                        | 25.5                  |
|                     |                     | $q_{e,Cal}$ (mg g <sup>-1</sup> )                               | 28.4                        | 11.6                  |
|                     |                     | $K_1$ (min <sup>-1</sup> )                                      | 0.0527                      | 0.0383                |
|                     |                     | $R^2$                                                           | 0.991                       | 0.981                 |
|                     | Pseudo-second-order | $q_{e,Exp}$ (mg g <sup>-1</sup> )                               | 69.2                        | 25.5                  |
|                     |                     | $q_{e,Cal}$ (mg g <sup>-1</sup> )                               | 72.1                        | 26.9                  |
|                     |                     | $K_2$ (g mg <sup>-1</sup> min <sup>-1</sup> )                   | $3.8 \times 10^{-3}$        | $6.7 \times 10^{-3}$  |
|                     |                     | $R^2$                                                           | 0.999                       | 0.998                 |
| Adsorption isotherm | Temkin              | $A$ (L g <sup>-1</sup> )                                        | 0.129                       | 0.146                 |
|                     |                     | $B$                                                             | 51.7                        | 45.3                  |
|                     |                     | $R^2$                                                           | 0.964                       | 0.965                 |
|                     | Freundlich          | $n$                                                             | 1.19                        | 1.26                  |
|                     |                     | $k_f$ (mg g <sup>-1</sup> (Lmg <sup>-1</sup> ) <sup>1/n</sup> ) | 3.37                        | 3.82                  |
|                     |                     | $R^2$                                                           | 0.992                       | 0.974                 |
|                     | Langmuir            | $q_{m,Exp}$ (mg g <sup>-1</sup> )                               | 123.6                       | 108.3                 |
|                     |                     | $q_{m,Cal}$ (mg g <sup>-1</sup> )                               | 381.7                       | 265.3                 |
|                     |                     | $b$ (L mg <sup>-1</sup> )                                       | $6.34 \times 10^{-3}$       | $9.75 \times 10^{-3}$ |
| $R^2$               |                     | 0.938                                                           | 0.851                       |                       |
| Thermodynamics      |                     | $\Delta G$ (kJ mol <sup>-1</sup> )                              | -3.01                       | -3.31                 |

**Table S2** Characteristic parameters of the adsorption of RhB on the Zr-BTB-H<sub>4</sub>TBAPy and PCN-134-2D.

|                     |                     | Shape                                                            | Zr-BTB-H <sub>4</sub> TBAPy | PCN-134-2D            |
|---------------------|---------------------|------------------------------------------------------------------|-----------------------------|-----------------------|
| Adsorption kinetics | Pseudo-first-order  | $q_{e,Exp}$ (mg.g <sup>-1</sup> )                                | 89.0                        | 82.4                  |
|                     |                     | $q_{e,Cal}$ (mg.g <sup>-1</sup> )                                | 24.8                        | 27.1                  |
|                     |                     | $K_1$ (min <sup>-1</sup> )                                       | 0.0688                      | 0.0498                |
|                     |                     | $R^2$                                                            | 0.996                       | 0.848                 |
|                     | Pseudo-second-order | $q_{e,Exp}$ (mg.g <sup>-1</sup> )                                | 89.0                        | 82.4                  |
|                     |                     | $q_{e,Cal}$ (mg.g <sup>-1</sup> )                                | 76.2                        | 85.4                  |
|                     |                     | $K_2$ (g mg <sup>-1</sup> min <sup>-1</sup> )                    | $6.1 \times 10^{-3}$        | $3.7 \times 10^{-3}$  |
|                     |                     | $R^2$                                                            | 0.999                       | 0.999                 |
| Adsorption isotherm | Temkin              | $A$ (L g <sup>-1</sup> )                                         | 0.0933                      | 0.104                 |
|                     |                     | $B$                                                              | 78.4                        | 67.9                  |
|                     |                     | $R^2$                                                            | 0.922                       | 0.936                 |
|                     | Freundlich          | $n$                                                              | 1.19                        | 1.27                  |
|                     |                     | $k_f$ (mg g <sup>-1</sup> (L mg <sup>-1</sup> ) <sup>1/n</sup> ) | 3.23                        | 3.03                  |
|                     |                     | $R^2$                                                            | 0.992                       | 0.975                 |
|                     | Langmuir            | $q_{m,Exp}$ (mg g <sup>-1</sup> )                                | 238.4                       | 203.2                 |
|                     |                     | $q_{m,Cal}$ (mg g <sup>-1</sup> )                                | 529.1                       | 386.1                 |
|                     |                     | $b$ (L mg <sup>-1</sup> )                                        | $3.55 \times 10^{-3}$       | $6.67 \times 10^{-3}$ |
| $R^2$               |                     | 0.939                                                            | 0.860                       |                       |
| Thermodynamics      |                     | $\Delta G$ (kJ mol <sup>-1</sup> )                               | -2.90                       | -2.75                 |
